# Supplementary material
Source: PubMed Central journal article supplement (PMC7439256)
Supplement: ac0c01933_si_001.pdf [file ac0c01933_si_001.pdf]

## Supporting Information for:

# Unequivocal Mapping of Molecular Ether Lipid Species by LC-MS/MS in Plasmalogen-Deficient Mice

Jakob Koch<sup>1</sup>, Katharina Lackner<sup>2</sup>, Yvonne Wohlfarter<sup>1</sup>, Sabrina Sailer<sup>2</sup>, Johannes Zschocke<sup>1</sup>, Ernst R. Werner<sup>2</sup>, Katrin Watschinger<sup>2\*</sup>, Markus A. Keller<sup>1\*</sup>

<sup>1</sup> Institute of Human Genetics, Medical University of Innsbruck, 6020 Innsbruck, Austria

<sup>2</sup> Institute of Biological Chemistry, Biocenter, Medical University of Innsbruck, 6020 Innsbruck, Austria

\* Correspondence to: [katrin.watschinger@i-med.ac.at](mailto:katrin.watschinger@i-med.ac.at) and [markus.keller@i-med.ac.at](mailto:markus.keller@i-med.ac.at)

## Content

|                                                                       |     |
|-----------------------------------------------------------------------|-----|
| Content .....                                                         | S1  |
| Supporting Methods: .....                                             | S2  |
| Breeding of Tmem189-deficient mice and harvest of mouse tissues ..... | S2  |
| Sample extraction and preparation .....                               | S2  |
| LC-MS/MS analysis .....                                               | S2  |
| Supporting Dataset .....                                              | S3  |
| Dataset S1 .....                                                      | S3  |
| Supporting Tables .....                                               | S4  |
| Table S1 .....                                                        | S4  |
| Table S2 .....                                                        | S5  |
| Table S3 .....                                                        | S6  |
| Table S4 .....                                                        | S12 |
| Supporting Figures .....                                              | S14 |
| Figure S1 .....                                                       | S14 |
| Figure S2 .....                                                       | S15 |

## Supporting Methods:

### ***Breeding of Tmem189-deficient mice and harvest of mouse tissues***

PEDS-deficient mice enzyme (Tmem189<sup>tm1a(KOMP)</sup>Wtsi mice, Wellcome Sanger Institute, Hinxton, Cambridge, UK, ref 13) and wild-type controls (C57bl/6N) were bred according to ref 5. Mice were housed in individual ventilated cages with nesting material, in a 12 h/12 h light/dark cycle with standard chow (Sniff Spezialdiäten GmbH, standard chow V1534-300, autoclaved at site) and water ad libitum. They were maintained on C57bl/6N genetic background and genotyped using primers Tmem189\_35635F (GCGTGTCTGCTGAGACTTG) and CAS\_R1\_Term (TCGTGGTATCGTTATGCGCC) for the transgenic allele and Tmem189\_35635F and Tmem189-35635R (CATCCCACCTATCCCACCTG) for the wildtype allele. Tissues were harvested at 8 weeks of age from female and male homozygous Peds-deficient mice and their wild type littermates after sacrificing the animals by cervical dislocation. Tissues were snap frozen in liquid nitrogen and stored at -80 °C until further analysis. Experiments were approved by the Austrian Federal Ministry of Education, Science and Research (BMBWF-66.011/0100-V/3b/2019).

### ***Sample extraction and preparation***

Sample preparation was performed as previously described in ref 14. Briefly tissues were homogenized in PBS with an Ultra-Turrax (T10, IKA, Staufen, Germany). The protein content was then measured with a standard Bradford assay depending on a BSA serial dilution for quantification. For lipid extraction per tissue 500 µg total protein aliquots were extracted following the Folch method. Dried lipid extracts were finally dissolved in 100 µl 1/1 (v/v) acetonitrile/ethanol and stored at -20 °C. Aliquots with lipids respective to 200 µg (and for brain tissues 150 µg) protein content were dried under N<sub>2</sub>-flow, dissolved in 100 µl HPLC starting conditions and subsequently measured.

### ***LC-MS/MS analysis***

The PC/PE analysis was performed as described in ref 15, with the modifications described in ref 16. 10 µl of the samples were injected by a Dionex Ultimate 3000 HPLC (ThermoFisher Scientific Inc, Waltham, USA) with a flowrate of 0.4 ml/min and a column oven temperature of 50 °C. The HPLC was operated using a reversed phase gradient with an Agilent Poroshell 120 EC-C8 2.7mm 2.1x100mm column (Agilent Technologies, Santa Clara, USA). For gradient elution running Solvent A (4/6 H<sub>2</sub>O/ammonium format, 0.2% formic acid) and running Solvent B (9/1 isopropanol/acetonitrile, 10 mM ammonium formate, 0.2% formic acid) were used. First, from 0 to 2 minutes, an isocratic flow with 54% Solvent A was applied, followed by a linear decrease from 54% to 28% Solvent A from minute 2 to minute 22. Next, the column was washed and equilibrated at starting conditions of 54% Solvent A. Further, lipids were ionized through negative electrospray ionization (275 °C capillary temperature, with mass range of 460-1650 m/z) in a LTQ Velos MS (Thermo Fisher Scientific Inc., Waltham, USA), whereas MS2 settings were variable depending on the expected PL. For general LC-MS parameters see Tables S1 and S2.

## Supporting Dataset

### **Dataset S1**

**Contains additional information and data for all 11 different mouse tissues analyzed.** For all tissues you will find there a PC and PE lipid profiles plot, a radyl and acyl chain plot for PE lipid species, and the data used for most of the analyses presented in this work. A detailed description file is included in the Repository (Readme.html) See Mendeley Data at <http://dx.doi.org/10.17632/r5twyf6bnn.1>

## Supporting Tables

**Table S1**

**HPLC method details.** Giving details about the different components and their respective settings regarding the used instrument Dionex Ultimate 3000 HPLC (ThermoFisher Scientific Inc, Waltham, USA).

| HPLC Component          | Applied settings                                                                                                                                                                |
|-------------------------|---------------------------------------------------------------------------------------------------------------------------------------------------------------------------------|
| Column temperature      | 50°C                                                                                                                                                                            |
| Autosampler temperature | 10°C                                                                                                                                                                            |
| Running solvent A       | 10 mM ammonium formate and 0.2% formic acid in 6/4 (v/v) acetonitrile/H <sub>2</sub> O                                                                                          |
| Running solvent B       | 10 mM ammonium formate and 0.2% formic acid in 9/1 (v/v) isopropanol/acetonitrile                                                                                               |
| Flow rate               | 0.4 ml/min from 0 to 22 minutes<br>0.5 ml/min from 22 to 23 minutes<br>0.6 ml/min from 23 to 28 minutes<br>0.5 ml/min from 28 to 29 minutes<br>0.4 ml/min from 29 to 30 minutes |
| Gradient                | 46% B for 2 min<br>46-72% B in 20 min<br>72-99% B in 1 min<br>99% B for 5 min<br>99-50% B in 1 min<br>46% B for 1 min                                                           |
| Sample amount           | 10 µl                                                                                                                                                                           |
| Washing volume          | 200 µl                                                                                                                                                                          |

## Table S2

**Mass spectrometric method details.** Giving details about the different components and their respective settings regarding the used instrument LTQ Velos MS (Thermo Fisher Scientific Inc., Waltham, USA).

| MS component                  | Setting                        |
|-------------------------------|--------------------------------|
| Source                        | ESI negative mode              |
| Capillary temperature         | 275 °C                         |
| Source voltage                | 3.8 kV                         |
| Scan rate                     | Normal                         |
| Activation type               | CID                            |
| Full mass range               | 460-1650 m/z                   |
| Isolation width               | 1.5                            |
| Normalized collision energy   | 30/38                          |
| Default charge state          | 1                              |
| Activation time               | 10ms                           |
| MS2 mass range                | 5-105% relative of parent mass |
| Number of micro scans Full MS | 3                              |
| Number of micro scans MS2     | 5                              |
| Dynamic exclusion             | Enabled                        |
| Exclusion duration            | 6 s                            |

**Table S3**

**Peaklist for the integration of glycerophosphatidylcholines and glycerophosphatidylethanolamines.** Column 1: Lipid identifier (nomenclature described in ref 46); Column 2: SubID for distinguishing between different peaks of the same isomeric species resulting from differing radyl combinations; Column 3: Respective retention times (in minutes); Column 4: Mass to charge ratios ( $m/z$ ) of the lipids; Column 5: base peak width (in minutes) calculated as  $t_{max} - t_{min}$ .

| Lipid species | SubID | Retention time (min) | $m/z$   | BPW (min) |
|---------------|-------|----------------------|---------|-----------|
| PC(32:0)      | 1     | 4.51                 | 778.729 | 0.166597  |
| PC(32:1)      | 1     | 4.23                 | 776.645 | 0.237063  |
| PC(32:1)      | 2     | 3.88                 | 776.620 | 0.299037  |
| PC(32:1)      | 3     | 4.05                 | 776.620 | 0.34059   |
| PC(32:1)      | 4     | 3.69                 | 776.586 | 0.158732  |
| PC(32:2)      | 1     | 2.99                 | 774.561 | 0.195799  |
| PC(33:2)      | 1     | 3.40                 | 788.565 | 0.169899  |
| PC(34:0)      | 1     | 5.78                 | 806.561 | 0.196704  |
| PC(34:1)      | 1     | 4.72                 | 804.658 | 0.204728  |
| PC(34:2)      | 1     | 3.86                 | 802.511 | 0.142141  |
| PC(34:3)      | 1     | 3.16                 | 800.610 | 0.174693  |
| PC(34:3)      | 2     | 3.40                 | 800.565 | 0.235651  |
| PC(36:0)      | 1     | 7.31                 | 834.658 | 0.342768  |
| PC(36:1)      | 1     | 6.03                 | 832.606 | 0.258207  |
| PC(36:2)      | 1     | 5.01                 | 830.584 | 0.182691  |
| PC(36:3)      | 1     | 4.11                 | 828.547 | 0.209035  |
| PC(36:4)      | 1     | 3.73                 | 826.479 | 0.147172  |
| PC(36:4)      | 2     | 3.30                 | 826.511 | 0.150288  |
| PC(36:5)      | 1     | 3.08                 | 824.494 | 0.195811  |
| PC(36:6)      | 1     | 2.62                 | 822.496 | 0.187365  |
| PC(36:7)      | 1     | 2.61                 | 820.513 | 0.181965  |
| PC(37:2)      | 1     | 5.69                 | 844.607 | 0.230799  |
| PC(37:3)      | 1     | 4.72                 | 842.591 | 0.19747   |
| PC(38:2)      | 1     | 6.51                 | 858.779 | 0.260506  |
| PC(38:2)      | 2     | 6.16                 | 858.722 | 0.309771  |
| PC(38:3)      | 1     | 5.61                 | 856.607 | 0.174773  |
| PC(38:3)      | 2     | 5.39                 | 856.607 | 0.175781  |
| PC(38:4)      | 1     | 4.91                 | 854.618 | 0.159161  |
| PC(38:4)      | 2     | 4.55                 | 854.583 | 0.207107  |
| PC(38:4)      | 3     | 4.35                 | 854.548 | 0.244778  |
| PC(38:5)      | 1     | 4.18                 | 852.591 | 0.274464  |
| PC(38:5)      | 2     | 3.97                 | 852.574 | 0.184996  |
| PC(38:5)      | 3     | 3.76                 | 852.591 | 0.207392  |
| PC(38:6)      | 1     | 3.47                 | 850.478 | 0.153984  |
| PC(38:6)      | 2     | 3.18                 | 850.495 | 0.162775  |
| PC(38:7)      | 1     | 2.84                 | 848.536 | 0.238436  |

|            |   |       |         |          |
|------------|---|-------|---------|----------|
| PC(38:7)   | 2 | 2.63  | 848.532 | 0.198988 |
| PC(40:0)   | 1 | 10.83 | 890.685 | 0.167431 |
| PC(40:1)   | 1 | 9.12  | 888.647 | 0.233164 |
| PC(40:2)   | 1 | 7.84  | 886.654 | 0.357445 |
| PC(40:3)   | 1 | 6.92  | 884.638 | 0.334337 |
| PC(40:3)   | 2 | 6.62  | 884.651 | 0.271277 |
| PC(40:4)   | 1 | 6.32  | 882.610 | 0.231211 |
| PC(40:4)   | 2 | 5.82  | 882.641 | 0.179022 |
| PC(40:5)   | 1 | 5.41  | 880.691 | 0.172851 |
| PC(40:5)   | 2 | 5.03  | 880.630 | 0.184235 |
| PC(40:5)   | 3 | 4.81  | 880.630 | 0.25063  |
| PC(40:5)   | 4 | 4.14  | 880.630 | 0.17417  |
| PC(40:6)   | 1 | 4.53  | 878.712 | 0.166068 |
| PC(40:6)   | 2 | 4.13  | 878.527 | 0.170882 |
| PC(40:7)   | 1 | 3.62  | 876.610 | 0.16709  |
| PC(40:7)   | 2 | 3.36  | 876.610 | 0.203261 |
| PC(40:7)   | 3 | 3.18  | 876.610 | 0.310579 |
| PC(40:8)   | 1 | 2.91  | 874.569 | 0.178516 |
| PC(40:9)   | 1 | 2.44  | 872.526 | 0.224422 |
| PC(41:4)   | 1 | 5.60  | 868.615 | 0.202395 |
| PC(O-32:0) | 1 | 5.30  | 764.664 | 0.209075 |
| PC(O-32:1) | 1 | 4.35  | 762.629 | 0.196252 |
| PC(O-34:2) | 1 | 4.64  | 788.599 | 0.167752 |
| PC(O-36:0) | 1 | 6.25  | 820.576 | 0.295241 |
| PC(O-36:0) | 2 | 5.06  | 820.614 | 0.193469 |
| PC(O-36:1) | 1 | 7.23  | 818.532 | 0.404213 |
| PC(O-36:2) | 1 | 5.94  | 816.612 | 0.308341 |
| PC(O-36:3) | 1 | 4.84  | 814.623 | 0.212182 |
| PC(O-36:4) | 1 | 4.50  | 812.583 | 0.183634 |
| PC(O-38:1) | 1 | 7.59  | 846.662 | 0.367895 |
| PC(O-38:2) | 1 | 7.52  | 844.677 | 0.250078 |
| PC(O-38:4) | 1 | 5.75  | 840.634 | 0.216293 |
| PC(O-38:4) | 2 | 4.36  | 840.634 | 0.16429  |
| PC(O-38:5) | 1 | 4.63  | 838.586 | 0.183154 |
| PC(O-38:5) | 2 | 4.40  | 838.681 | 0.313252 |
| PC(O-38:6) | 1 | 4.08  | 836.609 | 0.157464 |
| PC(O-38:7) | 1 | 3.25  | 834.584 | 0.274347 |
| PC(O-40:6) | 1 | 5.41  | 864.632 | 0.245683 |
| PC(O-40:6) | 2 | 5.26  | 864.637 | 0.232174 |
| PC(O-40:7) | 1 | 4.26  | 862.611 | 0.197312 |
| PC(O-40:8) | 1 | 3.39  | 860.591 | 0.18608  |
| PC(P-32:0) | 1 | 5.18  | 762.592 | 0.163605 |
| PC(P-34:1) | 1 | 5.49  | 788.522 | 0.339217 |
| PC(P-36:1) | 1 | 6.97  | 816.612 | 0.330522 |
| PC(P-36:2) | 1 | 5.73  | 814.596 | 0.285785 |
| PC(P-36:3) | 1 | 5.28  | 812.581 | 0.225074 |
| PC(P-36:4) | 1 | 4.36  | 810.490 | 0.300679 |
| PC(P-36:5) | 1 | 3.09  | 808.448 | 0.194987 |

|            |   |      |         |          |
|------------|---|------|---------|----------|
| PC(P-36:6) | 1 | 2.50 | 806.504 | 0.213078 |
| PC(P-38:1) | 1 | 7.81 | 844.671 | 0.376745 |
| PC(P-38:2) | 1 | 5.53 | 842.645 | 0.200175 |
| PC(P-38:4) | 1 | 5.54 | 838.662 | 0.206863 |
| PC(P-38:5) | 1 | 4.75 | 836.581 | 0.209468 |
| PC(P-38:6) | 1 | 4.02 | 834.608 | 0.386986 |
| PC(P-38:7) | 1 | 3.34 | 832.549 | 0.253262 |
| PC(P-40:6) | 1 | 5.11 | 862.566 | 0.206162 |
| PC(P-40:7) | 1 | 4.12 | 860.618 | 0.181354 |
| PC(P-40:8) | 1 | 3.29 | 858.664 | 0.351065 |
| PE(32:0)   | 1 | 4.83 | 690.540 | 0.15962  |
| PE(32:1)   | 1 | 3.98 | 688.510 | 0.151085 |
| PE(32:2)   | 1 | 3.19 | 686.460 | 0.171965 |
| PE(34:0)   | 1 | 6.17 | 718.517 | 0.161493 |
| PE(34:1)   | 1 | 5.11 | 716.764 | 0.178694 |
| PE(34:2)   | 1 | 4.17 | 714.621 | 0.141498 |
| PE(34:3)   | 1 | 3.38 | 712.576 | 0.16101  |
| PE(34:3)   | 2 | 3.65 | 712.478 | 0.227163 |
| PE(34:4)   | 1 | 3.09 | 710.627 | 0.178863 |
| PE(35:2)   | 1 | 4.76 | 728.608 | 0.160035 |
| PE(36:1)   | 1 | 6.53 | 744.540 | 0.223292 |
| PE(36:2)   | 1 | 5.45 | 742.507 | 0.173246 |
| PE(36:3)   | 1 | 4.42 | 740.478 | 0.175127 |
| PE(36:3)   | 2 | 4.81 | 740.559 | 0.390935 |
| PE(36:4)   | 1 | 4.07 | 738.482 | 0.138872 |
| PE(36:4)   | 2 | 3.58 | 738.450 | 0.149085 |
| PE(36:5)   | 1 | 3.25 | 736.479 | 0.159366 |
| PE(36:5)   | 2 | 2.89 | 736.519 | 0.202354 |
| PE(37:1)   | 1 | 7.23 | 758.576 | 0.251049 |
| PE(37:2)   | 1 | 6.13 | 756.629 | 0.202137 |
| PE(38:1)   | 1 | 8.17 | 772.621 | 0.206407 |
| PE(38:1)   | 2 | 7.97 | 772.657 | 0.244338 |
| PE(38:2)   | 1 | 6.95 | 770.564 | 0.217973 |
| PE(38:2)   | 2 | 6.67 | 770.617 | 0.263121 |
| PE(38:3)   | 1 | 6.28 | 768.533 | 0.205781 |
| PE(38:3)   | 2 | 5.97 | 768.533 | 0.16667  |
| PE(38:3)   | 3 | 5.78 | 768.560 | 0.176434 |
| PE(38:4)   | 1 | 5.27 | 766.503 | 0.177145 |
| PE(38:4)   | 2 | 4.88 | 766.476 | 0.176051 |
| PE(38:4)   | 3 | 4.73 | 766.503 | 0.184579 |
| PE(38:5)   | 1 | 4.27 | 764.532 | 0.156345 |
| PE(38:5)   | 2 | 3.97 | 764.583 | 0.221705 |
| PE(38:5)   | 3 | 4.56 | 764.532 | 0.330263 |
| PE(38:6)   | 1 | 3.70 | 762.509 | 0.147468 |
| PE(38:6)   | 2 | 3.42 | 762.476 | 0.233517 |
| PE(38:7)   | 1 | 3.97 | 760.458 | 0.184217 |
| PE(38:7)   | 2 | 3.65 | 760.501 | 0.239579 |
| PE(38:7)   | 3 | 3.49 | 760.487 | 0.182575 |



|            |   |       |         |          |
|------------|---|-------|---------|----------|
| PE(39:4)   | 1 | 5.97  | 780.604 | 0.18974  |
| PE(40:1)   | 1 | 9.99  | 800.586 | 0.239802 |
| PE(40:1)   | 2 | 10.46 | 800.567 | 0.183937 |
| PE(40:2)   | 1 | 8.36  | 798.594 | 0.272478 |
| PE(40:3)   | 1 | 7.35  | 796.720 | 0.221665 |
| PE(40:4)   | 1 | 6.76  | 794.631 | 0.27859  |
| PE(40:4)   | 2 | 6.21  | 794.559 | 0.175672 |
| PE(40:5)   | 1 | 5.82  | 792.594 | 0.18124  |
| PE(40:5)   | 2 | 5.42  | 792.671 | 0.248407 |
| PE(40:5)   | 3 | 5.10  | 792.550 | 0.23279  |
| PE(40:6)   | 1 | 4.86  | 790.583 | 0.151854 |
| PE(40:6)   | 2 | 4.21  | 790.625 | 0.19154  |
| PE(40:6)   | 3 | 3.51  | 790.550 | 0.17454  |
| PE(40:7)   | 1 | 3.90  | 788.509 | 0.152111 |
| PE(40:8)   | 1 | 3.11  | 786.512 | 0.169751 |
| PE(40:9)   | 1 | 2.60  | 784.543 | 0.193763 |
| PE(42:2)   | 1 | 10.01 | 826.608 | 0.198146 |
| PE(42:2)   | 2 | 9.67  | 826.608 | 0.209406 |
| PE(42:3)   | 1 | 8.69  | 824.720 | 0.227781 |
| PE(42:4)   | 1 | 7.50  | 822.705 | 0.245516 |
| PE(42:5)   | 1 | 6.34  | 820.631 | 0.302828 |
| PE(42:6)   | 1 | 5.37  | 818.660 | 0.240952 |
| PE(42:7)   | 1 | 4.46  | 816.680 | 0.162783 |
| PE(O-34:0) | 1 | 7.30  | 704.577 | 0.225921 |
| PE(O-34:1) | 1 | 6.03  | 702.662 | 0.214186 |
| PE(O-34:2) | 1 | 4.99  | 700.679 | 0.179768 |
| PE(O-34:3) | 1 | 4.04  | 698.658 | 0.162711 |
| PE(O-34:3) | 2 | 4.37  | 698.568 | 0.158151 |
| PE(O-34:4) | 1 | 3.69  | 696.591 | 0.161079 |
| PE(O-35:1) | 1 | 6.75  | 716.764 | 0.187278 |
| PE(O-35:2) | 1 | 5.63  | 714.621 | 0.178    |
| PE(O-35:4) | 1 | 4.24  | 710.579 | 0.152908 |
| PE(O-36:1) | 1 | 7.71  | 730.631 | 0.250061 |
| PE(O-36:1) | 2 | 7.46  | 730.562 | 0.38152  |
| PE(O-36:2) | 1 | 6.37  | 728.621 | 0.285603 |
| PE(O-36:3) | 1 | 5.83  | 726.594 | 0.204733 |
| PE(O-36:3) | 2 | 5.62  | 726.533 | 0.312631 |
| PE(O-36:3) | 3 | 5.36  | 726.594 | 0.19575  |
| PE(O-36:3) | 4 | 5.12  | 726.628 | 0.202648 |
| PE(O-36:4) | 1 | 4.83  | 724.550 | 0.151973 |
| PE(O-36:5) | 1 | 4.11  | 722.444 | 0.202695 |
| PE(O-36:5) | 2 | 3.88  | 722.479 | 0.151394 |
| PE(O-36:6) | 1 | 3.33  | 720.446 | 0.187549 |
| PE(O-37:4) | 1 | 5.51  | 738.570 | 0.164309 |
| PE(O-37:4) | 2 | 5.37  | 738.570 | 0.196999 |
| PE(O-37:6) | 1 | 3.78  | 734.522 | 0.165923 |
| PE(O-38:0) | 1 | 10.14 | 760.658 | 0.211456 |
| PE(O-38:0) | 2 | 10.63 | 760.597 | 0.177666 |

|             |   |       |         |          |
|-------------|---|-------|---------|----------|
| PE(O-38:1)  | 1 | 9.20  | 758.587 | 0.306851 |
| PE(O-38:2)  | 1 | 8.13  | 756.600 | 0.252232 |
| PE(O-38:2)  | 2 | 7.80  | 756.608 | 0.266428 |
| PE(O-38:3)  | 1 | 7.44  | 754.593 | 0.284787 |
| PE(O-38:3)  | 2 | 6.83  | 754.610 | 0.252814 |
| PE(O-38:4)  | 1 | 6.20  | 752.569 | 0.182063 |
| PE(O-38:4)  | 2 | 5.73  | 752.587 | 0.177284 |
| PE(O-38:5)  | 1 | 5.37  | 750.615 | 0.306834 |
| PE(O-38:5)  | 2 | 5.10  | 750.625 | 0.236244 |
| PE(O-38:5)  | 3 | 4.80  | 750.605 | 0.233243 |
| PE(O-38:6)  | 1 | 4.42  | 748.574 | 0.166432 |
| PE(O-38:7)  | 1 | 3.56  | 746.549 | 0.221824 |
| PE(O-39:5)  | 1 | 7.06  | 766.619 | 0.236816 |
| PE(O-39:7)  | 1 | 5.01  | 762.604 | 0.194583 |
| PE(O-40:1)  | 1 | 11.13 | 786.805 | 0.229395 |
| PE(O-40:2)  | 1 | 9.96  | 784.664 | 0.255863 |
| PE(O-40:3)  | 1 | 8.56  | 782.576 | 0.22972  |
| PE(O-40:3)  | 2 | 8.34  | 782.584 | 0.218451 |
| PE(O-40:4)  | 1 | 7.95  | 780.588 | 0.297793 |
| PE(O-40:4)  | 2 | 7.31  | 780.633 | 0.230334 |
| PE(O-40:5)  | 1 | 6.81  | 778.663 | 0.242573 |
| PE(O-40:5)  | 2 | 6.36  | 778.618 | 0.244077 |
| PE(O-40:5)  | 3 | 6.13  | 778.618 | 0.226285 |
| PE(O-40:6)  | 1 | 5.69  | 776.668 | 0.206162 |
| PE(O-40:7)  | 1 | 4.59  | 774.612 | 0.22179  |
| PE(O-40:8)  | 1 | 3.69  | 772.544 | 0.180811 |
| PE(O-40:9)  | 1 | 2.99  | 770.544 | 0.174586 |
| PE(O-42:10) | 1 | 4.80  | 796.600 | 0.169393 |
| PE(O-42:12) | 1 | 4.44  | 792.600 | 0.313333 |
| PE(O-42:6)  | 1 | 7.30  | 804.703 | 0.305466 |
| PE(O-42:7)  | 1 | 5.86  | 802.612 | 0.243888 |
| PE(P-34:0)  | 1 | 7.14  | 702.454 | 0.220687 |
| PE(P-34:1)  | 1 | 5.88  | 700.599 | 0.177374 |
| PE(P-34:2)  | 1 | 4.84  | 698.570 | 0.160928 |
| PE(P-34:3)  | 1 | 4.21  | 696.398 | 0.15869  |
| PE(P-34:3)  | 2 | 3.99  | 696.528 | 0.179597 |
| PE(P-34:4)  | 1 | 3.57  | 694.335 | 0.16005  |
| PE(P-35:1)  | 1 | 6.59  | 714.329 | 0.197703 |
| PE(P-35:2)  | 1 | 5.49  | 712.673 | 0.166445 |
| PE(P-35:4)  | 1 | 4.12  | 708.436 | 0.158825 |
| PE(P-36:1)  | 1 | 7.38  | 728.620 | 0.334584 |
| PE(P-36:2)  | 1 | 6.20  | 726.500 | 0.247797 |
| PE(P-36:3)  | 1 | 5.63  | 724.515 | 0.18147  |
| PE(P-36:3)  | 2 | 5.41  | 724.515 | 0.350202 |
| PE(P-36:3)  | 3 | 5.13  | 724.635 | 0.258507 |
| PE(P-36:4)  | 1 | 4.67  | 722.479 | 0.145428 |
| PE(P-36:5)  | 1 | 3.82  | 720.529 | 0.15205  |
| PE(P-36:6)  | 1 | 3.25  | 718.536 | 0.167316 |

|             |   |       |         |          |
|-------------|---|-------|---------|----------|
| PE(P-37:4)  | 1 | 5.35  | 736.525 | 0.168873 |
| PE(P-38:1)  | 1 | 9.02  | 756.602 | 0.232903 |
| PE(P-38:2)  | 1 | 7.93  | 754.512 | 0.256397 |
| PE(P-38:2)  | 2 | 7.61  | 754.646 | 0.251603 |
| PE(P-38:3)  | 1 | 7.16  | 752.578 | 0.363642 |
| PE(P-38:3)  | 2 | 6.62  | 752.467 | 0.333731 |
| PE(P-38:4)  | 1 | 6.01  | 750.615 | 0.167144 |
| PE(P-38:4)  | 2 | 5.59  | 750.605 | 0.203945 |
| PE(P-38:5)  | 1 | 5.17  | 748.502 | 0.25912  |
| PE(P-38:5)  | 2 | 4.95  | 748.553 | 0.222963 |
| PE(P-38:5)  | 3 | 4.76  | 748.584 | 0.28209  |
| PE(P-38:6)  | 1 | 4.25  | 746.474 | 0.151824 |
| PE(P-38:6)  | 2 | 3.97  | 746.535 | 0.174431 |
| PE(P-38:7)  | 1 | 3.52  | 744.498 | 0.170424 |
| PE(P-39:5)  | 1 | 6.80  | 764.569 | 0.231956 |
| PE(P-39:7)  | 1 | 4.83  | 760.487 | 0.155761 |
| PE(P-40:1)  | 1 | 10.91 | 784.727 | 0.188197 |
| PE(P-40:2)  | 1 | 9.19  | 782.690 | 0.253743 |
| PE(P-40:3)  | 1 | 8.33  | 780.556 | 0.211495 |
| PE(P-40:4)  | 1 | 7.73  | 778.648 | 0.262058 |
| PE(P-40:4)  | 2 | 7.17  | 778.633 | 0.210306 |
| PE(P-40:5)  | 1 | 6.55  | 776.628 | 0.245419 |
| PE(P-40:5)  | 2 | 6.20  | 776.655 | 0.368812 |
| PE(P-40:5)  | 3 | 5.98  | 776.664 | 0.213967 |
| PE(P-40:6)  | 1 | 5.53  | 774.629 | 0.165019 |
| PE(P-40:7)  | 1 | 4.49  | 772.499 | 0.181515 |
| PE(P-40:8)  | 1 | 3.60  | 770.620 | 0.159735 |
| PE(P-40:9)  | 1 | 2.93  | 768.510 | 0.179776 |
| PE(P-42:10) | 1 | 4.24  | 794.528 | 0.168127 |
| PE(P-42:6)  | 1 | 7.09  | 802.578 | 0.284406 |
| PE(P-42:7)  | 1 | 5.67  | 800.618 | 0.165514 |
| PE(P-42:8)  | 1 | 4.60  | 798.526 | 0.177889 |

**Table S4**

**Table detailing the systematic analysis of relative retention time differences (*rRT*). We analyzed relative *RT* changes for acyl chain elongation (+2 CH<sub>2</sub>), an additional acyl chain double bond (+1 DB (>Δ4)), additional vinyl ether double bonds (+1 DB (Δ1)), and between 1-O-alk-1'-enyl and 1-O-alkyl lipids in 6-10 relevant lipid species, which allowed us to number the impact of double bond positions and chain lengths on lipid retardation. Relative *RT* (*rRT*) was calculated as  $rRT = RT_{Lipid\ 1}[s] / RT_{Lipid\ 2}[s]$ . Values were first summarized per mouse (mean) and then summarized by calculation of mean and standard deviation of the twelve biological replicates.**

|                          | <b>Lipid 1</b> | <b>Lipid 2</b> | <b>Mean<br/>(<i>rRT</i>)</b> | <b>SD<br/>(<i>rRT</i>)</b> |
|--------------------------|----------------|----------------|------------------------------|----------------------------|
| <b>+2 CH<sub>2</sub></b> | PC(34:0)       | PC(32:0)       | 1.291                        | 0.013                      |
|                          | PC(34:1)       | PC(32:1)       | 1.131                        | 0.017                      |
|                          | PC(34:2)       | PC(32:2)       | 1.310                        | 0.012                      |
|                          | PC(36:1)       | PC(34:1)       | 1.283                        | 0.011                      |
|                          | PC(36:2)       | PC(34:2)       | 1.304                        | 0.006                      |
|                          | PC(38:3)       | PC(36:3)       | 1.324                        | 0.039                      |
|                          | PE(34:0)       | PE(32:0)       | 1.294                        | 0.039                      |
|                          | PE(34:1)       | PE(32:1)       | 1.284                        | 0.009                      |
|                          | PE(34:2)       | PE(32:2)       | 1.334                        | 0.053                      |
|                          | PE(36:1)       | PE(34:1)       | 1.285                        | 0.023                      |
|                          | PE(36:2)       | PE(34:2)       | 1.301                        | 0.011                      |
|                          | PE(38:3)       | PE(36:3)       | 1.331                        | 0.041                      |
|                          | PC(32:1)       | PC(32:0)       | 0.837                        | 0.008                      |
|                          | PC(32:2)       | PC(32:1)       | 0.703                        | 0.015                      |
|                          | PC(34:1)       | PC(34:0)       | 0.821                        | 0.008                      |
|                          | PC(34:2)       | PC(34:1)       | 0.814                        | 0.004                      |
|                          | PC(34:3)       | PC(34:2)       | 0.810                        | 0.005                      |
|                          | PC(36:2)       | PC(36:1)       | 0.827                        | 0.008                      |
|                          | PC(36:3)       | PC(36:2)       | 0.820                        | 0.004                      |
|                          | PE(32:1)       | PE(32:0)       | 0.826                        | 0.005                      |
| PE(32:2)                 | PE(32:1)       | 0.788          | 0.031                        |                            |
| <b>+1 DB (&gt;Δ4)</b>    | PE(34:1)       | PE(34:0)       | 0.820                        | 0.023                      |
|                          | PE(34:2)       | PE(34:1)       | 0.817                        | 0.003                      |
|                          | PE(34:3)       | PE(34:2)       | 0.804                        | 0.006                      |
|                          | PE(36:2)       | PE(36:1)       | 0.827                        | 0.010                      |
|                          | PE(36:3)       | PE(36:2)       | 0.810                        | 0.007                      |
|                          | PE(P-34:1)     | PE(P-34:0)     | 0.828                        | 0.014                      |
|                          | PE(P-34:2)     | PE(P-34:1)     | 0.817                        | 0.012                      |
| <b>+1 DB (Δ1)</b>        | PE(P-34:3)     | PE(P-34:2)     | 0.863                        | 0.016                      |
|                          | PC(P-36:1)     | PC(O-36:1)     | 0.977                        | 0.026                      |
|                          | PC(P-36:2)     | PC(O-36:2)     | 0.955                        | 0.021                      |
|                          | PC(P-36:4)     | PC(O-36:4)     | 0.955                        | 0.012                      |
|                          | PC(P-38:4)     | PC(O-38:4)     | 0.949                        | 0.018                      |
|                          | PC(P-38:6)     | PC(O-38:6)     | 0.962                        | 0.005                      |

|                           |            |            |       |       |
|---------------------------|------------|------------|-------|-------|
|                           | PC(P-40:6) | PC(O-40:6) | 0.957 | 0.012 |
|                           | PC(P-40:8) | PC(O-40:8) | 0.966 | 0.031 |
|                           | PE(P-34:0) | PE(O-34:0) | 0.977 | 0.013 |
|                           | PE(P-34:1) | PE(O-34:1) | 0.987 | 0.010 |
|                           | PE(P-34:2) | PE(O-34:2) | 0.974 | 0.008 |
|                           | PE(P-36:1) | PE(O-36:1) | 0.984 | 0.017 |
|                           | PE(P-36:2) | PE(O-36:2) | 0.981 | 0.014 |
|                           | PE(P-36:5) | PE(O-36:5) | 0.942 | 0.017 |
| 1-O-alk-1'-enyl/1-O-alkyl | PC(P-34:1) | PC(O-34:2) | 1.188 | 0.018 |
|                           | PC(P-36:1) | PC(O-36:2) | 1.172 | 0.025 |
|                           | PC(P-36:2) | PC(O-36:3) | 1.181 | 0.026 |
|                           | PC(P-36:3) | PC(O-36:4) | 1.185 | 0.027 |
|                           | PC(P-38:1) | PC(O-38:2) | 1.053 | 0.024 |
|                           | PC(P-38:5) | PC(O-38:6) | 1.140 | 0.012 |
|                           | PC(P-38:6) | PC(O-38:7) | 1.206 | 0.014 |
|                           | PC(P-40:7) | PC(O-40:8) | 1.226 | 0.008 |
|                           | PE(P-34:0) | PE(O-34:1) | 1.193 | 0.024 |
|                           | PE(P-34:1) | PE(O-34:2) | 1.192 | 0.018 |
|                           | PE(P-34:2) | PE(O-34:3) | 1.201 | 0.023 |
|                           | PE(P-35:1) | PE(O-35:2) | 1.177 | 0.024 |
|                           | PE(P-36:1) | PE(O-36:2) | 1.162 | 0.031 |
|                           | PE(P-36:4) | PE(O-36:5) | 1.151 | 0.021 |
|                           | PE(P-38:1) | PE(O-38:2) | 1.117 | 0.014 |

## Supporting Figures

**Figure S1**

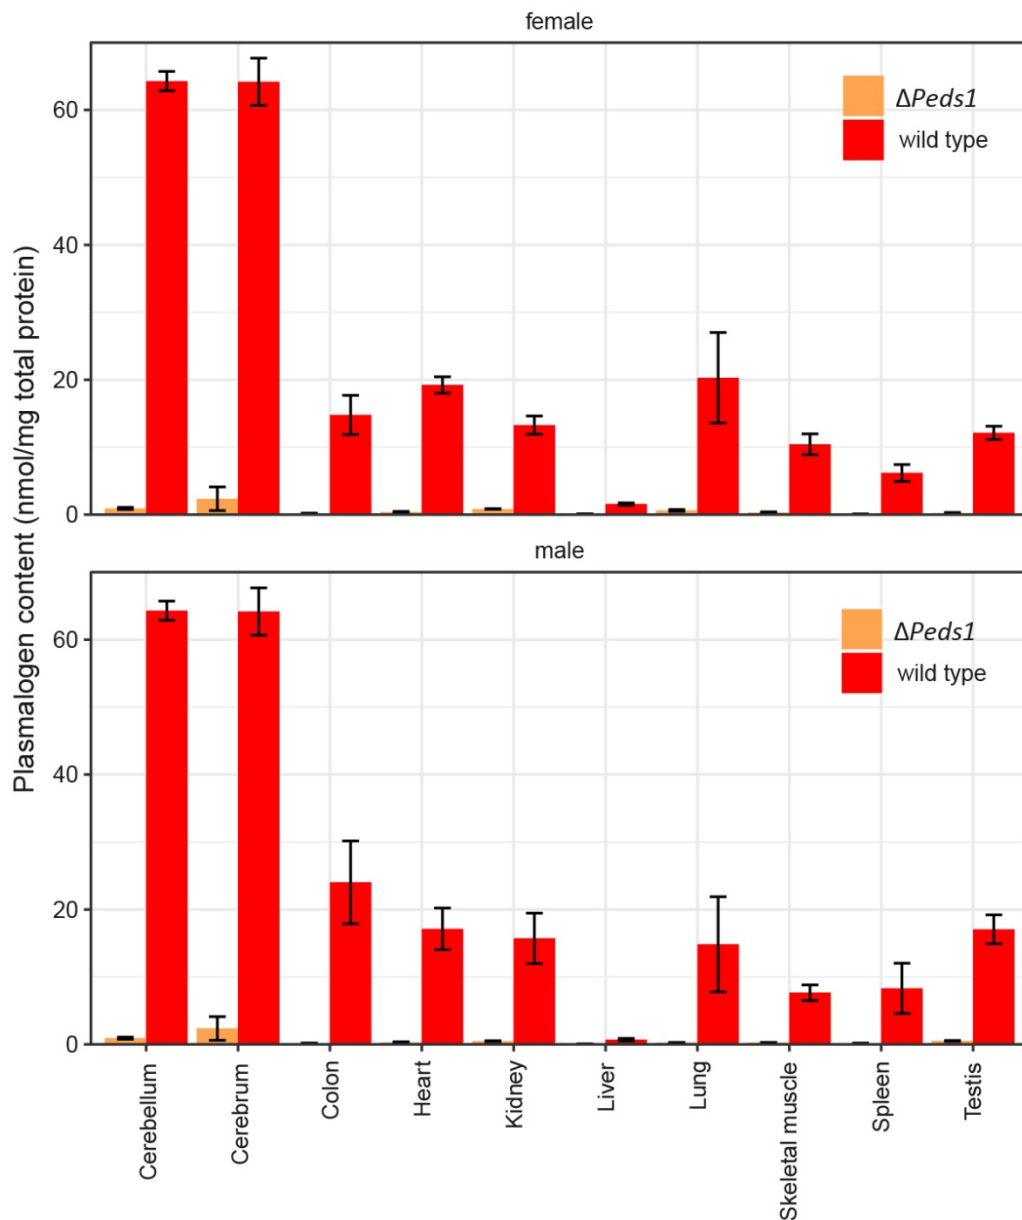

**Figure S1: Plasmalogen content per mg total protein.** Measured using the plasmalogen analysis method reported in ref 14. Data visualized from values in ref 5.

**Figure S2**

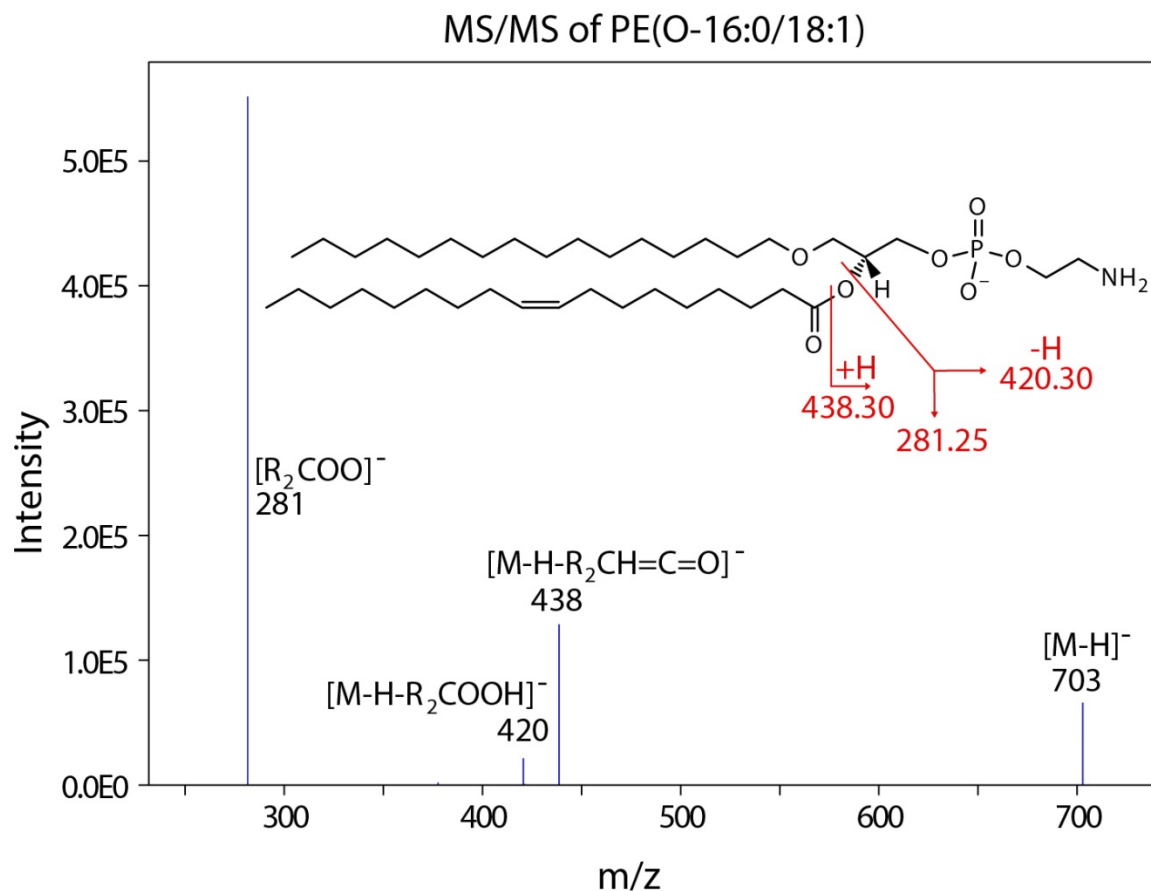

**Figure S2: Fragment spectrum of PE(O-16:0/18:1) single lipid standard.** Typical fragmentation behavior of plasmanyl and plasmenyl lipids are i) a hydrogen rearrangement and simultaneous neutral loss leading to either a  $M-H-R_2CH=C=O^-$  (438 m/z) or a  $M-H-R_2COOH^-$  (420 m/z) fragment and ii) breakage at the sn-2 position producing a side chain fragment ( $R_2COO^-$ , 281 m/z).  $R_2$ : sn-2 residue. No fragmentation of the sn-1 position was observed (expected major fragment would be at 255 m/z).
